# Supplementary material for: The Role of Exercise Training in Delaying Kidney Function Decline in Non-Dialysis-Dependent Chronic Kidney Disease
Source: MDPI journal article supplement (doi:10.3390/kidneydial2020026), 2022-05-25
Supplement: s1 [file s1]

Archive with 1 entries (1 files):
- kidneydial-1655126-supplementary.pdf
