# Supplementary material for: The Role of Exercise Training in Delaying Kidney Function Decline in Non-Dialysis-Dependent Chronic Kidney Disease
Source: MDPI journal article supplement (doi:10.3390/kidneydial2020026), 2022-05-25
Supplement: s1 [file s1 › kidneydial-1655126-supplementary.pdf]

## Supplementary Material

### Search strategy

The meta-analyses reviewed in this paper, and other referenced studies, were identified using a comprehensive search for peer-reviewed manuscripts in MEDLINE (up to December 2021). Search terms included Medical Subject Headings (MeSH) terms and key words related to CKD and exercise and physical training terms:

Chronic kidney disease terms (population) (chronic kidney disease[Title/Abstract] OR “Kidney Failure, Chronic”[Mesh] OR “Renal Insufficiency, Chronic”[Mesh] OR “Kidney Diseases”[Mesh])

Exercise terms (intervention) (“Exercise”[Mesh] OR “Rehabilitation”[Mesh] OR “exercise therapy”[MeSH] OR “Exercise Movement Techniques”[Mesh] OR “Exercise Therapy”[Mesh] OR “Warm-Up Exercise”[Mesh] OR “Plyometric Exercise”[Mesh] OR “Circuit-Based Exercise”[Mesh] OR “Resistance Training”[Mesh] OR “High-Intensity Interval Training”[Mesh] OR physical training[Title/Abstract] OR physical activity[Title/Abstract] OR physical fitness[Title/Abstract] OR resistance training[Title/Abstract] OR resistance exercise[Title/Abstract] OR resistance program[Title/Abstract] OR strength program[Title/Abstract] OR strength exercise[Title/Abstract] OR strength training[Title/Abstract] OR aerobic training[Title/Abstract] OR aerobic program[Title/Abstract] OR aerobic exercise[Title/Abstract] OR exercise training OR tai chi[Title/Abstract] OR swimming[Title/Abstract] OR running[Title/Abstract] OR cycling[Title/Abstract] OR Walking[Title/Abstract])

**Table S1.** Studies included in published systematic reviews of effects of exercise on kidney function in ND-CKD.

| Yamamoto<br>2021               | Nakamura<br>2020               | Wu 2020           | Villanego<br>2020              | Zhang 2019                     | Vanden<br>Wyngaert<br>2018     |
|--------------------------------|--------------------------------|-------------------|--------------------------------|--------------------------------|--------------------------------|
| Aoike 2015                     | Aoike 2018                     | Barcellos<br>2018 | Aoike 2015                     | Aoike 2015                     | Aoike 2015                     |
| Baria 2014                     | Barcellos<br>2018              | Greenwood<br>2015 | Aoike 2018                     | Baria 2014                     | Baria 2014                     |
| Gomes 2017                     | Beetham<br>2018                | Hiraki 2017       | Baria 2014                     | Greenwood<br>2015              | Greenwood<br>2015              |
| Greenwood<br>2015              | Greenwood<br>2015              | Leehey 2016       | Gomes 2017                     | Headley 2012                   | Headley 2012                   |
| Headley 2012                   | Headley 2012                   | Liang 2016        | Greenwood<br>2015              | Hiraki 2017                    | Howden<br>2013                 |
| Howden<br>2015                 | Hiraki 2017                    | Liang 2018        | Headley 2012                   | Howden<br>2015                 | Leehey 2009                    |
| Ikizler 2018                   | Leehey 2016                    | Zhang 2019        | Leehey 2016                    | Kiuchi 2017                    | Leehey 2016                    |
| Leehey 2009                    | Van Crae-<br>nenbroeck<br>2015 | Hamada<br>2016    | Hiraki 2017                    | Leehey 2009                    | Miele 2017                     |
| Leehey 2016                    | Kirkman<br>2019                | Nylen 2015        | Howden<br>2013                 | Leehey 2016                    | Van Crae-<br>nenbroeck<br>2015 |
| Miele 2017                     |                                |                   | Howden<br>2015                 | Miele 2017                     |                                |
| Van Crae-<br>nenbroeck<br>2015 |                                |                   | Leehey 2009                    | Van Crae-<br>nenbroeck<br>2015 |                                |
|                                |                                |                   | Van Crae-<br>nenbroeck<br>2015 | Toyama 2010                    |                                |

*Note:* Studies which have been included in systematic reviews and meta-analyses investigating the effects of exercise training on kidney function in non-dialysis CKD patients. Studies included in multiple systematic reviews are given colours. Publications which represent sub-samples or interim analysis of a larger study are all highlighted with the same colour. Studies which appear in only one review are not highlighted with colour

**Table S2.** Effect of Exercise Training on Kidney Function in NDD-CKD: summary of study results.

| Study Reference        | Kidney function measure                                | Exercise Treatment Result, baseline to follow-up (ml/min/1.73 <sup>2</sup> ) | Comparator Result, baseline to follow-up (ml/min/1.73 <sup>2</sup> ) | Interpretation/Notes                                                                                                         |
|------------------------|--------------------------------------------------------|------------------------------------------------------------------------------|----------------------------------------------------------------------|------------------------------------------------------------------------------------------------------------------------------|
| Castaneda 2001, 2004   | measured GFR (I <sup>125</sup> -iothalamate clearance) | 1.18*                                                                        | -1.62                                                                | Significantly improved eGFR with exercise training vs small decrease in low-protein diet alone.                              |
| Greenwood 2015         | eGFR (CKD-EPI Cr)                                      | 3.7*                                                                         | -4.8                                                                 | Significant within-group improvement in eGFR in ET, vs decline in UC. Also improvement in annual rate of eGFR decline vs UC. |
| Kiuchi 2017            | eGFR (CKD-EPI Cr)                                      | <i>ModET</i> : 12.1*                                                         | <i>HIIT</i> : 1.4                                                    | Moderate exercise improves eGFR in training 18-26 months (between and within-group comparisons)                              |
| Shi 2014               | eGFR (Chinese MDRD)                                    | 6.0*                                                                         | -2.0                                                                 | Improved eGFR in Tai Chi group (BGD and WGD)                                                                                 |
| Beetham 2018           | eGFR (CKD-EPI Cys)                                     | -0.7                                                                         | -2.4*                                                                | Significant within-group decline in eGFR <sub>cys</sub> in UC; no between group differences                                  |
| Aoike 2018 (2015)      | eGFR (CKD-EPI Cr)                                      | <i>Centre-based</i> 0.9<br><i>Home-based</i> 2.4                             | -1.2                                                                 | No effect on eGFR (Improved eGFR at 12 weeks in Aoike 2015 substudy)                                                         |
| Barcellos 2018         | eGFR (CKD-EPI Cr)                                      | -1.9                                                                         | -2.6                                                                 | No effect on eGFR                                                                                                            |
| Eidemak 1997           | mGFR ( <sup>51</sup> Cr-EDTA)                          | -0.27                                                                        | -0.28                                                                | No effect on change in mGFR                                                                                                  |
| Headley 2012           | eGFR (MDRD)                                            | 1.0                                                                          | 5.0                                                                  | No effect on eGFR & no difference in rate of change eGFR per month                                                           |
| Hiraki 2017            | eGFR (Japanese Cr equation)                            | -1.9                                                                         | -1.6                                                                 | No effect on eGFR                                                                                                            |
| Ikizler 2018           | eGFR (CKD-EPI Cys)                                     | <i>ET</i> : 1.44<br><i>ET&amp;diet</i> 0.15                                  | -0.02                                                                | No effect on eGFR                                                                                                            |
| Kirkman 2019           | eGFR (MDRD)                                            | 0                                                                            | 0                                                                    | No effect on eGFR                                                                                                            |
| Leehey 2009            | GFR (urine Cr and urea clearance)                      | -5                                                                           | -6                                                                   | No effect on eGFR                                                                                                            |
| Leehey 2016            | eGFR (MDRD)                                            | -1.9                                                                         | -3.1                                                                 | No effect on eGFR at 12 or 52 weeks                                                                                          |
| Miele 2017             | eGFR (MDRD)                                            | 5.4                                                                          | 1.8                                                                  | No effect on eGFR                                                                                                            |
| Mustata 2011           | eGFR (MDRD)                                            |                                                                              |                                                                      | No effect (no numbers reported)                                                                                              |
| Van Craenenbroeck 2015 | eGFR (MDRD)                                            | 0.74                                                                         | -0.33                                                                | No effect on eGFR                                                                                                            |
| Hellberg 2019          | mGFR (iohexol clearance)                               | -1.8                                                                         | -1.8                                                                 | No non-exercise control. Both groups decreased (statistically significant)                                                   |

*Note:* Summary of individual exercise training studies which report kidney function findings. Studies with statistically significant results suggesting a benefit of exercise training (ET) vs usual care (UC) are listed first, with significant results marked with an asterix(\*). "No effect" implies no statistically significant changes in either within-group or between group comparisons. The results shown are the absolute difference between baseline and final follow up, or mean estimated effect size if reported; negative numbers indicate a decline in kidney function.
